# Supplementary material
Source: PubMed Central journal article supplement (PMC8238662)
Supplement: mmc1.pdf [file mmc1.pdf]

**Supplemental information**

**SARS-CoV-2 variant B.1.617 is resistant  
to bamlanivimab and evades antibodies  
induced by infection and vaccination**

**Markus Hoffmann, Heike Hofmann-Winkler, Nadine Krüger, Amy Kempf, Inga Nehlmeier, Luise Graichen, Prerna Arora, Anzhalika Sidarovich, Anna-Sophie Moldenhauer, Martin S. Winkler, Sebastian Schulz, Hans-Martin Jäck, Metodi V. Stankov, Georg M.N. Behrens, and Stefan Pöhlmann**

**Figure S1**

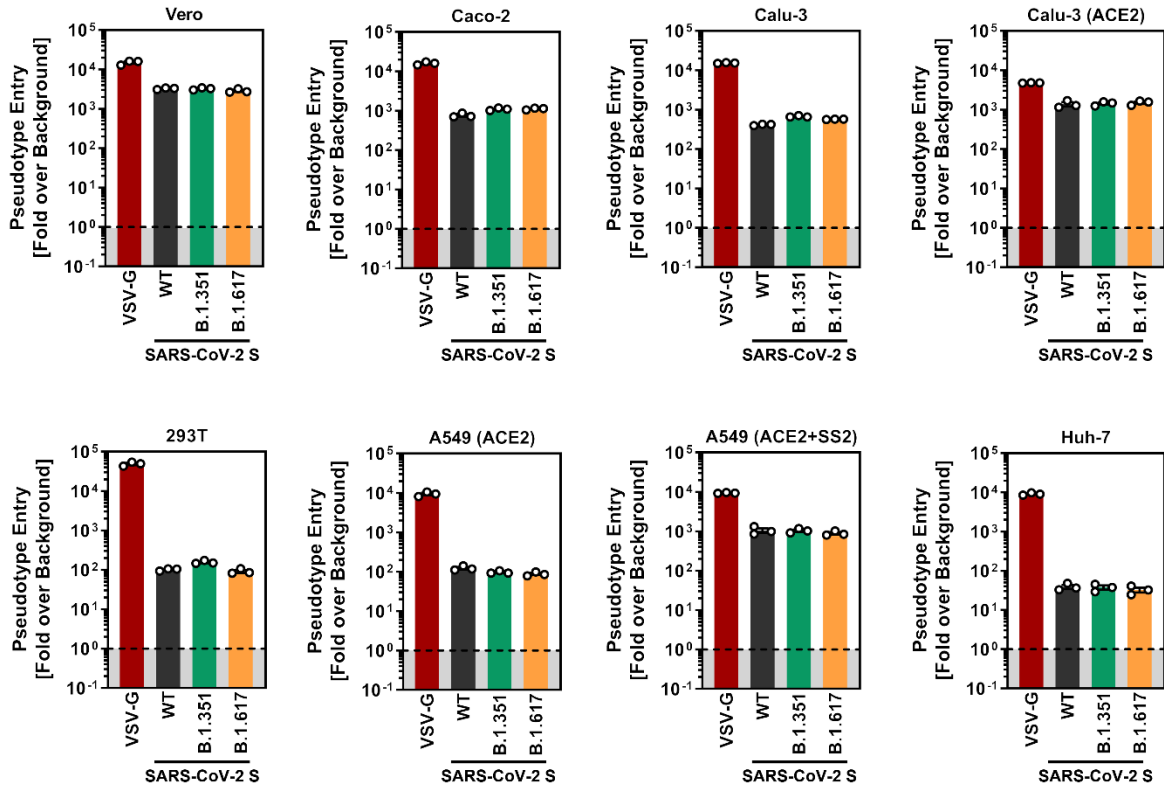

**Figure S1. Transduction data normalized against the assay background (related to Figure 2).**

The experiment was performed as described in the legend of Figure 1A. Presented are the average (mean) data from the same three biological replicates (each conducted with technical quadruplicates) as presented in Figure 2A with the difference that this time transduction was normalized against signals obtained from cells inoculated with particles bearing no viral glycoprotein (background, set as 1). Further, transduction data of particles bearing VSV-G are included. Error bars indicate the SEM.

Figure S2

A)

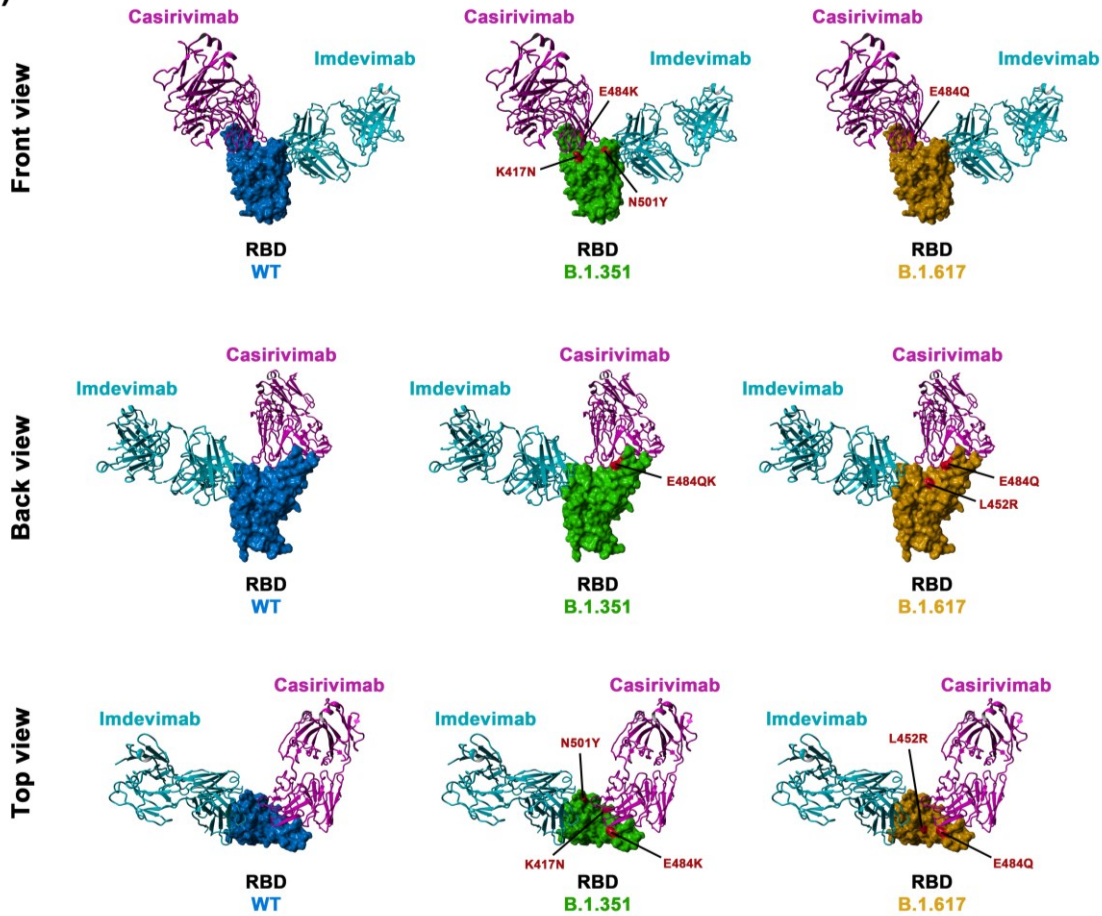

B)

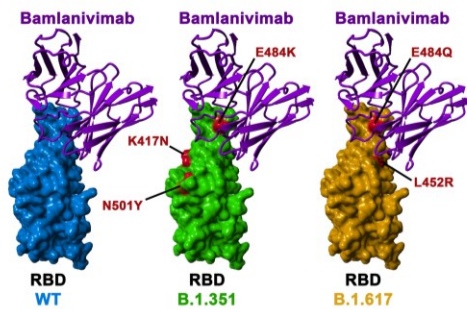

C)

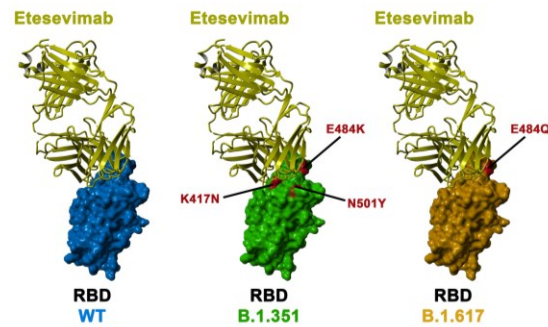

Figure S2. Location of SARS-2-S B.1.351 and B.1.617 RBD mutations with respect to the binding interface of Casirivimab and Imdevimab (A), Bamlanivimab (B) and Etesevimab (C) (related to Figure 4).

The protein models of the SARS-2-S receptor-binding domain (RBD, blue) in complex with antibodies Casirivimab (pink) and Imdevimab (turquoise) were constructed based on the 6XDG template (Hansen et al., 2020), while the protein models of the SARS-2-S RBD in complex with antibody Bamlanivimab (purple) and Etesevimab (yellow) were based on the PDB: 7L3N (Jones et al., 2020) and PDB: 7C01 (Shi et al., 2020) template, respectively. Residues highlighted in red indicate amino acid variations found in the SARS-CoV-2 variants.

# Figure S3

A)

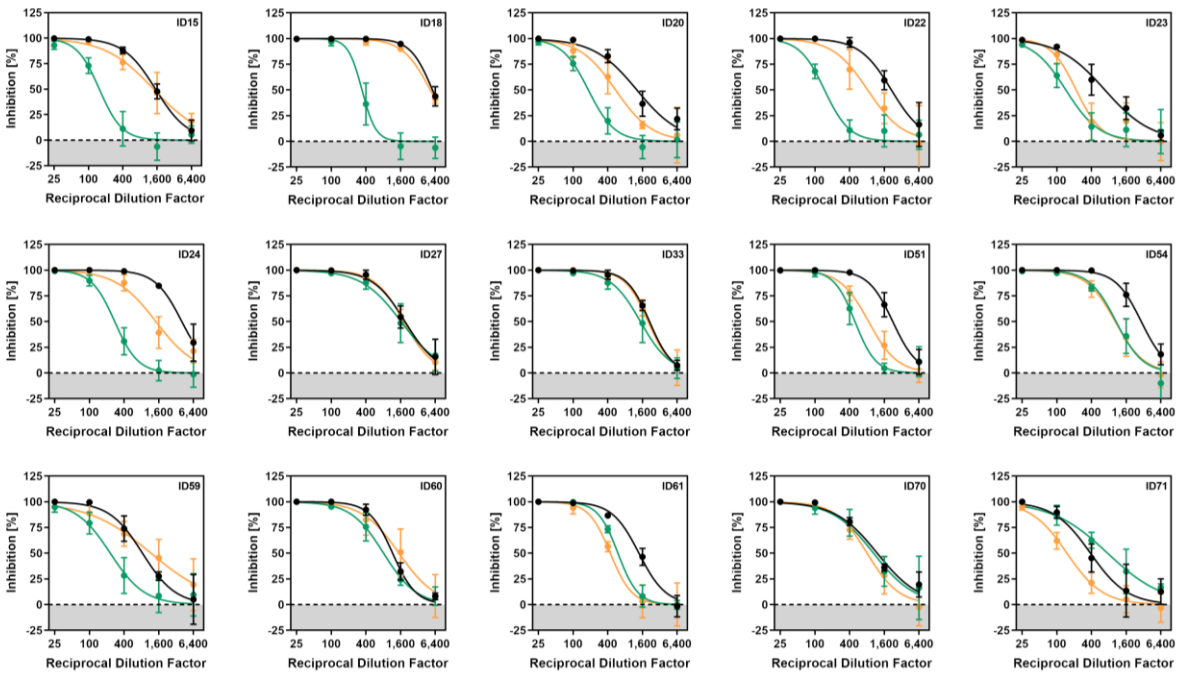

B)

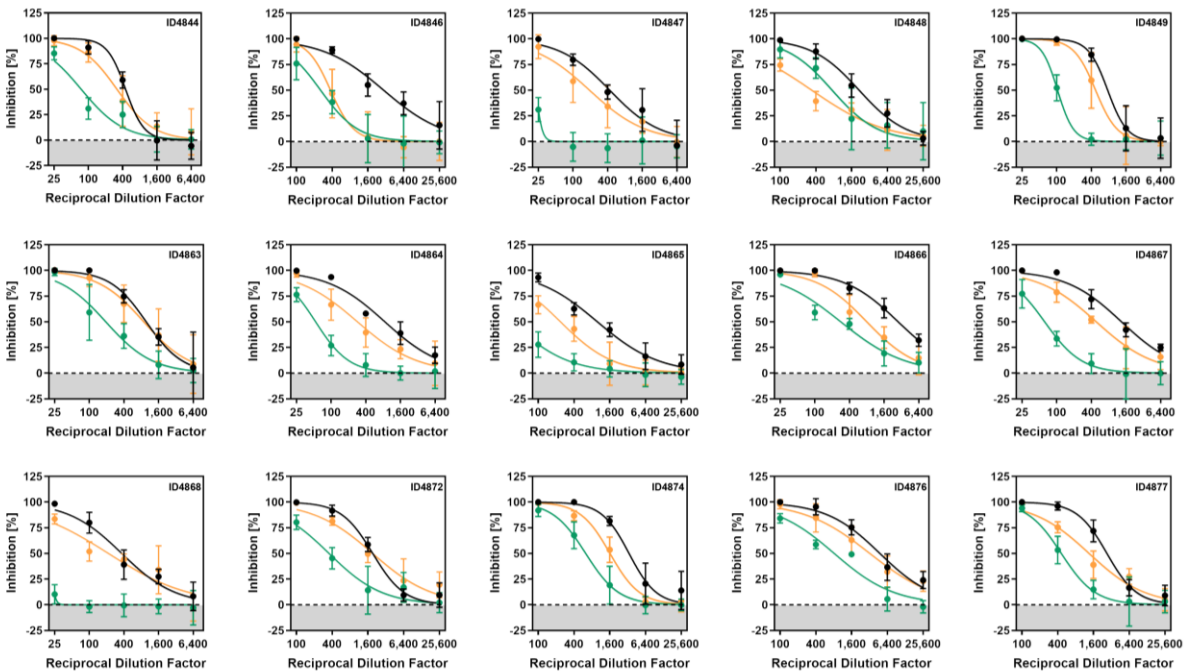

**Figure S3. Individual neutralization data (related to Figure 5).**

Pseudotypes bearing the indicated S proteins were incubated (30 min, 37 °C) with different dilutions of plasma derived from COVID-19 patients (A) or individuals vaccinated with the Pfizer/BioNTech vaccine Comirnaty/BNT162b2 (B) and inoculated onto Vero target cells. Transduction efficiency was quantified by

measuring virus-encoded luciferase activity in cell lysates at 16-18 h posttransduction. Presented are the data from a single representative experiment conducted with technical Quadruplicates. For normalization, inhibition of S protein-driven entry in samples without plasma was set as 0 %. Error bars indicate the SD. The data were further used to calculate the plasma/serum dilution that leads to 50% reduction in S protein-driven cell entry (neutralizing titer, NT50, shown in Figure 5).

# Table S1

Table S1: COVID-19 patient data (related to Figure 5).

| ID    | Symptoms before hospital admission (days) | Symptoms before ICU admission (days) | WHO classification upon ICU admission |          |        |          | Age | Sex | Diabetes | Hypertension | Cardiac disease | Chronic lung disease | Cerebrovascular disease | Chronic kidney disease | Immunosuppression | Cancer | Obesity | Smoking |
|-------|-------------------------------------------|--------------------------------------|---------------------------------------|----------|--------|----------|-----|-----|----------|--------------|-----------------|----------------------|-------------------------|------------------------|-------------------|--------|---------|---------|
|       |                                           |                                      | mild                                  | moderate | severe | critical |     |     |          |              |                 |                      |                         |                        |                   |        |         |         |
| SI 15 | ND                                        | ND                                   | -                                     | -        | -      | x        | 65  | M   |          |              | x               |                      |                         |                        |                   | x      |         |         |
| SI 16 | ND                                        | ND                                   | -                                     | x        | -      | x        | 71  | M   |          |              |                 |                      |                         |                        |                   | x      |         |         |
| SI 18 | 2                                         | 11                                   | -                                     | -        | -      | x        | 74  | F   | x        | x            |                 |                      |                         |                        |                   | x      |         |         |
| SI 20 | ND                                        | ND                                   | -                                     | -        | -      | x        | 61  | M   | x        |              |                 | x                    |                         |                        |                   |        |         |         |
| SI 22 | 5                                         | 5                                    | -                                     | -        | -      | x        | 25  | F   |          |              |                 |                      |                         |                        |                   |        | x       |         |
| SI 23 | 2                                         | 8                                    | -                                     | -        | x      | -        | 69  | F   | x        |              |                 |                      |                         |                        |                   |        |         |         |
| SI 24 | 4                                         | 8                                    | -                                     | -        | -      | x        | 61  | M   |          | x            |                 |                      |                         |                        |                   |        |         | x       |
| SI 27 | ND                                        | ND                                   | -                                     | -        | -      | x        | 52  | M   | x        | x            |                 |                      |                         |                        |                   |        |         |         |
| SI 33 | 1                                         | 14                                   | -                                     | -        | -      | x        | 75  | M   | x        | x            | x               |                      |                         |                        |                   |        |         |         |
| SI 51 | 4                                         | 12                                   | -                                     | -        | -      | x        | 71  | M   |          |              |                 |                      |                         |                        |                   |        |         |         |
| SI 54 | 8                                         | 7                                    | -                                     | -        | -      | x        | 58  | F   |          | x            |                 | x                    |                         |                        |                   | x      |         |         |
| SI 59 | 6                                         | 3                                    | -                                     | -        | -      | x        | 46  | M   |          | x            | x               |                      |                         | x                      |                   |        |         | x       |
| SI 60 | 5                                         | 6                                    | -                                     | -        | -      | x        | 61  | F   |          |              |                 | x                    |                         |                        |                   |        |         |         |
| SI 61 | 7                                         | 2                                    | -                                     | -        | -      | x        | 50  | M   |          |              |                 | x                    |                         |                        |                   |        | x       |         |
| SI 70 | ND                                        | ND                                   | -                                     | -        | x      | -        | 34  | F   |          |              |                 |                      |                         |                        |                   |        |         |         |
| SI 71 | 5                                         | 3                                    | -                                     | x        | -      | -        | 54  | M   |          | x            |                 |                      |                         |                        |                   |        |         |         |

ND =Not determined

## Table S2

**Table S1: BNT162b2-vaccinated patient data (related to Figure 5).**

BNT162b2-vaccinated patient data. Serological data shows antibody titer against spike (IgG) protein determined by quantitative ELISA (SARS-CoV-2-QuantiVac; Euroimmun, Lübeck, Germany) according to the manufacturer's instructions. Antibody levels are expressed as RU/mL assessed from a calibration curve with values above 10 RU/mL defined as positive, values beyond the standard curve are expressed as >120 RU/mL.

| <b>ID</b> | <b>Age (years)</b> | <b>Sex</b> | <b>Time since 2<sup>nd</sup> vaccination (days)</b> | <b>Spike-IgG</b> |
|-----------|--------------------|------------|-----------------------------------------------------|------------------|
| 4844      | 47                 | F          | 31                                                  | >120             |
| 4846      | 28                 | F          | 29                                                  | >120             |
| 4847      | 57                 | F          | 26                                                  | >120             |
| 4848      | 29                 | M          | 26                                                  | >120             |
| 4849      | 39                 | M          | 24                                                  | >120             |
| 4863      | 58                 | F          | 26                                                  | >120             |
| 4864      | 53                 | F          | 26                                                  | >120             |
| 4865      | 57                 | M          | 25                                                  | >120             |
| 4866      | 59                 | F          | 29                                                  | >120             |
| 4867      | 52                 | F          | 30                                                  | 34,4             |
| 4868      | 56                 | F          | 30                                                  | 119.6            |
| 4872      | 37                 | F          | 25                                                  | >120             |
| 4874      | 26                 | F          | 29                                                  | >120             |
| 4876      | 27                 | F          | 30                                                  | >120             |
| 4877      | 29                 | F          | 28                                                  | >120             |
